# Supplementary material for: Association of Surrogate Decision-making Interventions for Critically Ill Adults With Patient, Family, and Resource Use Outcomes: A Systematic Review and Meta-analysis
Source: PubMed Central journal article supplement (PMC6646989; doi:10.1001/jamanetworkopen.2019.7229), 2019-07-19
Supplement: jamanetwopen-2-e197229-s001.pdf [file jamanetwopen-2-e197229-s001.pdf]

## Supplementary Online Content

Bibas L, Peretz-Larochelle M, Adhikari NK, et al. Association of surrogate decision-making interventions for critically ill adults with patient, family, and resource use outcomes: a systematic review and meta-analysis. *JAMA Netw Open*. 2019;2(7):e197229. doi:10.1001/jamanetworkopen.2019.7229

**eTable 1.** Medline (Ovid) Search Strategy

**eTable 2.** Risk of Bias Assessment Using the Cochrane Risk of Bias Tool for Randomized Controlled Trials

**eTable 3.** Summary of Individual Trial Results

**eFigure 1.** Forest Plots for Psychological Comorbidities in Family Members, Including Depression, Anxiety, and PTSD

**eFigure 2.** Funnel Plot for All-Cause Mortality

**eReferences.**

This supplementary material has been provided by the authors to give readers additional information about their work.

**eTable1.** Medline (Ovid) search strategy

| #  | Searches                                                                                                                                                                                                       |
|----|----------------------------------------------------------------------------------------------------------------------------------------------------------------------------------------------------------------|
| 1  | exp Advance Directives/ and Decision Making/                                                                                                                                                                   |
| 2  | Advance Care Planning/                                                                                                                                                                                         |
| 3  | Living Wills/                                                                                                                                                                                                  |
| 4  | Proxy/                                                                                                                                                                                                         |
| 5  | Third-Party Consent/                                                                                                                                                                                           |
| 6  | Presumed Consent/                                                                                                                                                                                              |
| 7  | Patient Preference/ and Decision Making/                                                                                                                                                                       |
| 8  | exp Family/ and Decision Making/                                                                                                                                                                               |
| 9  | Critically ill/ and Decision Making/                                                                                                                                                                           |
| 10 | Terminally Ill/ and Decision Making/                                                                                                                                                                           |
| 11 | Caregivers/ and Decision Making/                                                                                                                                                                               |
| 12 | Legal Guardians/ and Decision Making/                                                                                                                                                                          |
| 13 | Moral Obligation/ and Decision Making/                                                                                                                                                                         |
| 14 | Personal Satisfaction/ and Decision Making/                                                                                                                                                                    |
| 15 | Advance? Care Planning.mp.                                                                                                                                                                                     |
| 16 | Advance? Care Directive?.mp.                                                                                                                                                                                   |
| 17 | (alternate? adj3 (decision-mak* or consent*)).mp.                                                                                                                                                              |
| 18 | (alternative?? adj3 (decision-mak* or consent*)).mp.                                                                                                                                                           |
| 19 | ((carer? or caregiver? or care-giver?) adj3 (decision-mak* or consent*)).mp.                                                                                                                                   |
| 20 | ((family or families) adj3 (decision-mak* or consent*)).mp.                                                                                                                                                    |
| 21 | (guardian* adj3 (decision-mak* or consent*)).mp.                                                                                                                                                               |
| 22 | ((proxy or proxies) adj3 (decision-mak* or consent*)).mp.                                                                                                                                                      |
| 23 | (relative? adj3 (decision-mak* or consent*)).mp.                                                                                                                                                               |
| 24 | (spous??? adj3 (decision-mak* or consent*)).mp.                                                                                                                                                                |
| 25 | (substitute? adj3 (decision-mak* or consent*)).mp.                                                                                                                                                             |
| 26 | (surrogate? adj3 (decision-mak* or consent*)).mp.                                                                                                                                                              |
| 27 | (third party?? adj2 (decision-mak* or consent*)).mp.                                                                                                                                                           |
| 28 | ((family or families or carer? or caregiver? or care-giver? or guardian* or proxy or proxies or representative? or spous???) adj3 (share or shares or shared or sharing) adj2 (decision-mak* or consent?)).mp. |
| 29 | (consent adj2 board?).mp.                                                                                                                                                                                      |
| 30 | decisional surrogate?.mp.                                                                                                                                                                                      |
| 31 | (decision-making adj2 representative?).mp.                                                                                                                                                                     |
| 32 | (health* adj2 (proxy or proxies)).mp.                                                                                                                                                                          |
| 33 | ("living will" or "living wills").mp.                                                                                                                                                                          |
| 34 | substitute health-care decision*.mp.                                                                                                                                                                           |
| 35 | substitute healthcare decision*.mp.                                                                                                                                                                            |

|    |                                                                                                |
|----|------------------------------------------------------------------------------------------------|
| 36 | (surrogacy and (decision* adj3 authorit*)).mp.                                                 |
| 37 | surrogate consenter?.mp.                                                                       |
| 38 | (surrogate and (decision* adj3 authorit*)).mp.                                                 |
| 39 | third party decision*.mp.                                                                      |
| 40 | "power? of attorney".mp.                                                                       |
| 41 | (patient?? adj1 agent?).mp.                                                                    |
| 42 | (patient? adj2 (proxy or proxies)).mp.                                                         |
| 43 | (patient?? adj2 (surrogate? or surrogacy)).mp.                                                 |
| 44 | attorney for personal.mp.                                                                      |
| 45 | attorney-in-fact.mp.                                                                           |
| 46 | public guardian?.mp.                                                                           |
| 47 | public trustee?.mp.                                                                            |
| 48 | <b>or/1-47 [ Substitute Decision Makers &amp; related terms ]</b>                              |
| 49 | exp randomized controlled trial/ [MeSH]                                                        |
| 50 | exp randomized controlled trials as topic/ [MeSH]                                              |
| 51 | randomized controlled trial.pt.                                                                |
| 52 | (random* adj10 (study or studies or trial?)).mp,kw.                                            |
| 53 | Random Allocation/                                                                             |
| 54 | doubleblind*.mp.                                                                               |
| 55 | Double-Blind Method/                                                                           |
| 56 | ((single or double or triple or treble) adj6 (blind* or mask* or conceal* or allocat*)).mp,kw. |
| 57 | exp Meta-Analysis/                                                                             |
| 58 | meta-analysis as topic/                                                                        |
| 59 | meta-analysis.pt.                                                                              |
| 60 | (meta-anal* or metanal* or metaanal*).mp,kw.                                                   |
| 61 | metareview*.mp,kw.                                                                             |
| 62 | meta-review*.mp,kw.                                                                            |
| 63 | (systematic adj4 (review or reviews or overview or overviews)).mp,kw.                          |
| 64 | (umbrella adj3 review?).mp,kw.                                                                 |
| 65 | <b>or/49-64 [ RCTs or SRs or MAs ]</b>                                                         |
| 66 | <b>48 and 65 [ Substitute Decision Makers + RCTs /SRs/MAs ]</b>                                |
| 67 | limit 66 to (english or french)                                                                |
| 68 | remove duplicates from 67                                                                      |

1 **eTable 2.** Risk of Bias Assessment Using the Cochrane Risk of Bias Tool for Randomized Controlled Trials

| <b>First Author &amp; year</b>  | <b>Random Sequence Generation</b> | <b>Allocation Concealment</b> | <b>Blinding of participants and researchers</b> | <b>Blinding of outcome assessment</b> | <b>Incomplete outcome data</b> | <b>Selective reporting</b> |
|---------------------------------|-----------------------------------|-------------------------------|-------------------------------------------------|---------------------------------------|--------------------------------|----------------------------|
| Andereck <sup>1</sup> 2014      | Low                               | Unclear                       | High                                            | Unclear                               | Low                            | High                       |
| Azoulay <sup>2</sup> 2002       | Low                               | Low                           | High                                            | Low                                   | Low                            | Low                        |
| Carson <sup>3</sup> 2016        | Low                               | Unclear                       | High                                            | Low                                   | Unclear                        | Low                        |
| Cheung <sup>4</sup> 2010        | Low                               | Low                           | High                                            | Unclear                               | High                           | Low                        |
| Connors <sup>5</sup> 1995       | High                              | Unclear                       | High                                            | Low                                   | Low                            | Low                        |
| Curtis <sup>6</sup> 2011        | Low                               | Unclear                       | High                                            | Unclear                               | Low                            | Low                        |
| Curtis <sup>7</sup> 2016        | Unclear                           | Low                           | High                                            | Unclear                               | Low                            | Low                        |
| Lautrette <sup>8</sup> 2007     | Low                               | Low                           | High                                            | Low                                   | Low                            | Low                        |
| Schneiderman <sup>9</sup> 2000  | Unclear                           | Unclear                       | High                                            | Unclear                               | Low                            | Low                        |
| Schneiderman <sup>10</sup> 2003 | Low                               | Low                           | High                                            | Low                                   | Low                            | Low                        |
| Torke <sup>11</sup> 2016        | Low                               | Low                           | High                                            | Unclear                               | High                           | Low                        |
| White <sup>12</sup> 2018        | Low                               | Unclear                       | High                                            | Low                                   | Low                            | Low                        |
| Wilson <sup>13</sup> 2015       | Low                               | Low                           | High                                            | Low                                   | Low                            | Low                        |

2

**eTable 3:** Summary of individual trial results

| Category                | First Author (year)           | Patient-Related                                                                                                                                                                                                    | SDM-Related                                                                                           | Resource-Utilization                                          |
|-------------------------|-------------------------------|--------------------------------------------------------------------------------------------------------------------------------------------------------------------------------------------------------------------|-------------------------------------------------------------------------------------------------------|---------------------------------------------------------------|
| Healthcare professional | Connors (1995) <sup>5</sup>   | Hospital/6m mortality: ND<br>Composite of ICU LOS, MV or comatose: ND<br>Satisfaction with care: ND<br>Documentation of DNR: ND<br>Discussion about CPR: ND                                                        | Satisfaction with care: ND<br>Discussion about CPR: ND                                                | Hospital resources: ND                                        |
|                         | Curtis (2011) <sup>6</sup>    | ICU LOS: ND<br>DNR orders: ND<br>WLST: ND                                                                                                                                                                          | Satisfaction with care: ND<br>Quality of death: ND                                                    | Palliative care team consultation: ND                         |
|                         | Curtis (2016) <sup>7</sup>    | ICU/Hospital mortality: ND<br>ICU LOS: ND but shorter amongst decedents (7.7d vs 28.5d)<br>Hospital LOS: Reduced (24.1d v 32.6d)<br>WLST among deceased: ND<br>Time to WLST among deceased: Reduced (7.2d v 16.5d) | Depression: Decreased symptoms at 6 months (ND at 3 months)<br>Anxiety and PTSD at 3 and 6 months: ND | ICU and hospital costs: Decreased, especially among decedents |
|                         | Lautrette (2007) <sup>8</sup> | Mortality: ND<br>ICU LOS: ND<br>WLST: Reduction in MV (27% v 14%),<br>Vasopressors (51% v 30%) but ND in dialysis                                                                                                  | Depression, anxiety, PTSD: Reduction at 3 months<br>Conflict between staff and family: ND             | NA                                                            |
|                         | Torke (2016) <sup>11</sup>    | NA                                                                                                                                                                                                                 | Depression, anxiety, PTSD at 6-8 weeks: ND<br>Decision conflict/regret: ND                            | NA                                                            |
|                         | White (2018) <sup>12</sup>    | In-hospital mortality: Increased<br>Six-month mortality: ND<br>Reduced ICU LOS 6.7d v 7.4d<br>Reduced hospital LOS: 10.4d v 13.5d<br>Independent living: ND                                                        | Depression, anxiety, PTSD at 6 months: ND<br>Improved quality of communication with intervention      | Mean cost of intervention: \$170 per patient                  |
| Ethics                  | Andereck (2014) <sup>1</sup>  | Mortality: ND<br>ICU and hospital LOS: ND<br>Length of MV: ND<br>Artificial nutrition: ND                                                                                                                          | Quality of care: ND                                                                                   | Cost of hospital stay: ND                                     |

|                 |                                   |                                                                                                                                                                          |                                                                                                                                                                |                                      |
|-----------------|-----------------------------------|--------------------------------------------------------------------------------------------------------------------------------------------------------------------------|----------------------------------------------------------------------------------------------------------------------------------------------------------------|--------------------------------------|
|                 | Schneiderman (2000) <sup>9</sup>  | Mortality: ND<br>CPR/MV/DNR order: ND<br>ICU LOS in all: ND<br>Amongst decedents, reduced ICU LOS (4.2d v 13.2d), MV (3.7d v 11.4d), artificial nutrition (4.1d v 12.0d) | Intervention was regarded favourably                                                                                                                           | NA                                   |
|                 | Schneiderman (2003) <sup>10</sup> | Mortality: ND<br>ICU/Hospital LOS/MV in all: ND<br>Amongst decedents, reduction in hospital LOS (-2.95 d), ICU LOS (-1.44d), MV (-1.7d)                                  | Intervention was deemed helpful                                                                                                                                | NA                                   |
| Palliative care | Carson (2016) <sup>3</sup>        | Hospital and 90d mortality: ND<br>ICU/Hospital LOS: ND<br>Length of MV: ND                                                                                               | PTSD at 3 months: Increased<br>Anxiety/Depression at 3 months: ND<br>Satisfaction: ND<br>Quality of communication: ND<br>Discussion of patient preferences: ND | NA                                   |
|                 | Cheung (2010) <sup>4</sup>        | Mortality: ND<br>ICU/Hospital LOS: ND                                                                                                                                    | Satisfaction: ND                                                                                                                                               | Number of medical teams involved: ND |
| Media           | Azoulay (2002) <sup>2</sup>       | Mortality: ND<br>ICU LOS: ND                                                                                                                                             | Comprehension: Improved<br>Satisfaction: ND<br>Anxiety/Depression at 3-5 days: ND                                                                              | NA                                   |
|                 | Wilson (2015) <sup>13</sup>       | CPR knowledge: improved<br>Resuscitation preferences: ND<br>Documented change in code status: ND<br>Utilization of CPR or MV: ND                                         | Comprehension of CPR and other options: improved                                                                                                               | NA                                   |

Abbreviations: CPR = cardio-pulmonary resuscitation; d = days; LOS = length of stay; MV = mechanical ventilation; ICU = intensive care unit; NA = not assessed; ND = no difference; WLST = withdrawal of life-sustaining therapies.

**eFigure 1.** Forest plots for psychological comorbidities in family members, including (A) depression, (B) anxiety, and (C) PTSD.

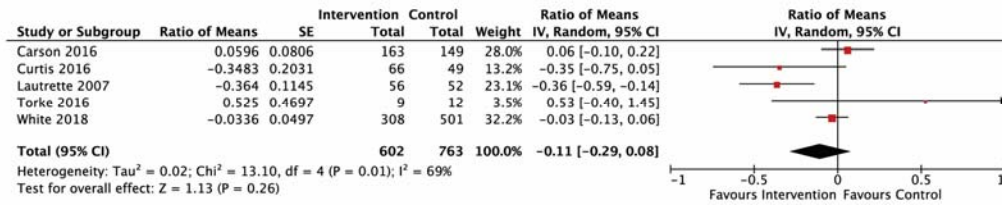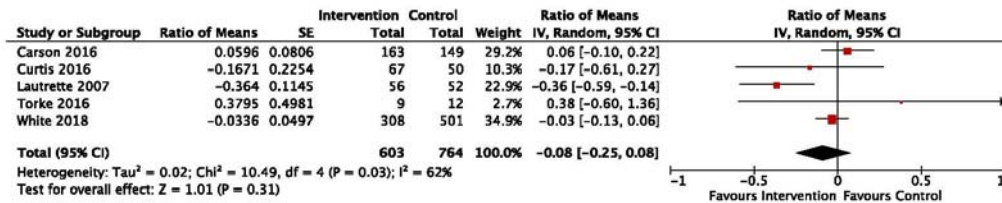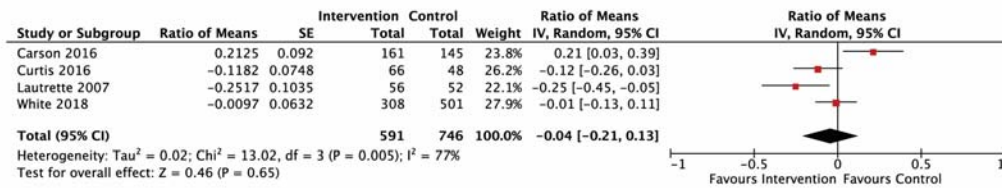

**eFigure 2.** Funnel plot for all-cause mortality.

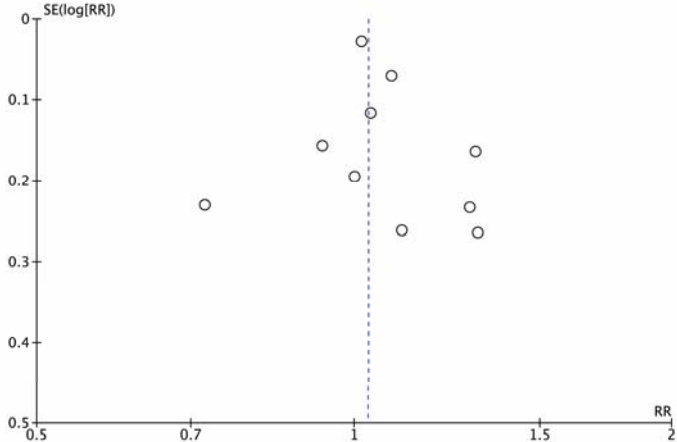



## eReferences.

1. Andereck WS, McGaughey JW, Schneiderman LJ, Jonsen AR. Seeking to reduce nonbeneficial treatment in the ICU: an exploratory trial of proactive ethics intervention. *Crit Care Med.* 2014;42(4):824-830.
2. Azoulay E, Pochard F, Chevret S, et al. Impact of a family information leaflet on effectiveness of information provided to family members of intensive care unit patients: a multicenter, prospective, randomized, controlled trial. *Am J Respir Crit Care Med.* 2002;165(4):438-442.
3. Carson SS, Cox CE, Wallenstein S, et al. Effect of palliative care–led meetings for families of patients with chronic critical illness: a randomized clinical trial. *JAMA.* 2016;316(1):51-62
4. Cheung W, Aggarwal G, Fugaccia E, et al. Palliative care teams in the intensive care unit: a randomised, controlled, feasibility study. *Crit Care Resusc.* 2010;12(1):28-35
5. Connors AF, Dawson NV, Desbiens NA, et al; The SUPPORT Principal Investigators. A controlled trial to improve care for seriously ill hospitalized patients: the Study to Understand Prognoses and Preferences for Outcomes and Risks of Treatments (SUPPORT). *JAMA.* 1995;274(20):1591-1598
6. Curtis JR, Nielsen EL, Treece PD, et al. Effect of a quality-improvement intervention on end-of-life care in the intensive care unit: a randomized trial. *Am J Respir Crit Care Med.* 2011;183(3):348-355
7. Curtis JR, Treece PD, Nielsen EL, et al. Randomized trial of communication facilitators to reduce family distress and intensity of end-of-life care. *Am J Respir Crit Care Med.* 2016;193(2):154-162
8. Lautrette A, Darmon M, Megarbane B, et al. A communication strategy and brochure for relatives of patients dying in the ICU. *N Engl J Med.* 2007;356(5):469-478
9. Schneiderman LJ, Gilmer T, Teetzel HD. Impact of ethics consultations in the intensive care setting: a randomized, controlled trial. *Crit Care Med.* 2000;28(12):3920-3924
10. Schneiderman LJ, Gilmer T, Teetzel HD, et al. Effect of ethics consultations on nonbeneficial life-sustaining treatments in the intensive care setting: a randomized controlled trial. *JAMA.* 2003;290(9):1166-1172
11. Torke AM, Wocial LD, Johns SA, et al. The family navigator: a pilot intervention to support intensive care unit family surrogates. *Am J Crit Care.* 2016;25(6):498-507
12. White DB, Angus DC, Shields A-M, et al. A randomized trial of a family-support intervention in intensive care units. *N Eng J Med.* 2018;378(25):2365-2375
13. Wilson ME, Krupa A, Hinds RF, et al. A video to improve patient and surrogate understanding of cardiopulmonary resuscitation choices in the ICU: a randomized controlled trial. *Crit Care Med.* 2015;43(3):621-629
